# Supplementary material
Source: HighWire-hosted journal article supplement (https://cmaj.ca/highwire/filestream/58854/field_highwire_adjunct_files/0/five-oral-1-at.pdf)
Supplement: five-oral-1-at.pdf [file five-oral-1-at.pdf]

**Appendix 1:** Effects of dabigatran etexilate and rivaroxaban on common coagulation tests<sup>1-5</sup>

| Test                                                              | Dabigatran etexilate                         | Rivaroxaban                                  |
|-------------------------------------------------------------------|----------------------------------------------|----------------------------------------------|
| Activated partial thromboplastin time (APTT)                      | Prolongation, large variation among reagents | Prolongation, large variation among reagents |
| Prothrombin time (Quick method)                                   | Marked prolongation                          | Marked prolongation                          |
| Prothrombin time (Owren method)                                   | Moderate prolongation                        | Moderate prolongation                        |
| Fibrinogen (Clauss method)                                        | Moderate to marked underestimation           | Minimal effect                               |
| Thrombin time                                                     | Marked prolongation                          | Minimal effect                               |
| HepTest assay for monitoring heparin in plasma and whole blood    | Not applicable                               | Marked, dose-dependent overestimation        |
| Activated factor X (FXa) activity                                 | Not applicable                               | Marked overestimation                        |
| Antithrombin (thrombin-inhibition method)                         | Marked overestimation                        | No effect                                    |
| Antithrombin (FXa-inhibition method)                              | Minimal effect                               | Marked overestimation                        |
| Activated protein C resistance (APTT-based)                       | False-negative results                       | False-negative results                       |
| Activated protein C resistance (prothrombinase-activation method) | False-negative results                       | No effect                                    |

**References**

1. Stangier J, Rathgen K, Stahle H, et al. The pharmacokinetics, pharmacodynamics and tolerability of dabigatran etexilate, a new oral direct thrombin inhibitor, in healthy male subjects. *Br J Clin Pharmacol* 2007;64:292-303.
2. Kubitzka D, Becka M, Wensing G, et al. Safety, pharmacodynamics, and pharmacokinetics of BAY 59-7939 — an oral, direct factor Xa inhibitor — after multiple dosing in healthy male subjects. *Eur J Clin Pharmacol* 2005;61:873-80.
3. Lindahl TL, Baghaei F, Blixter IF, et al. Effects of the oral, direct thrombin inhibitor dabigatran on five common coagulation assays. *Thromb Haemost* 2011;105:371-8.
4. Hillarp A, Baghaei F, Fagerberg Blixter I, et al. Effects of the oral, direct factor Xa inhibitor rivaroxaban on commonly used coagulation assays. *J Thromb Haemost* 2011;9:133-9.
5. Wong PC, Crain EJ, Watson CA, et al. Favorable therapeutic index of the direct factor Xa inhibitors, apixaban and rivaroxaban, compared with the thrombin inhibitor dabigatran in rabbits. *J Thromb Haemost* 2009;7:1313-20.
